# Supplementary material for: Impact of Cadmium Exposure on the Association between Lipopolysaccharide and Metabolic Syndrome
Source: MDPI journal article supplement (doi:10.3390/ijerph120911396), 2015-09-11
Supplement: s1 [file s1]

## Impact of Cadmium Exposure on the Association between Lipopolysaccharide and Metabolic Syndrome

**Table S1.** Odds ratios (OR) and 95% confidence intervals (CI) for metabolic syndrome and associated risk factors according to the LPS/HDL ratio in men.

|                          |      | LPS/HDL Quartiles |       |                      |        |       |       |                      |         |       |       |                   |         |  |  |
|--------------------------|------|-------------------|-------|----------------------|--------|-------|-------|----------------------|---------|-------|-------|-------------------|---------|--|--|
|                          |      | Quartile 1 (<0.6) |       | Quartile 2 (0.6–1.1) |        |       |       | Quartile 3 (1.1–2.1) |         |       |       | Quartile 4 (≥2.1) |         |  |  |
|                          |      | OR                | OR    | (95% CI)             |        |       | OR    | (95% CI)             |         |       | OR    | (95% CI)          |         |  |  |
| Metabolic syndrome       |      |                   |       |                      |        |       |       |                      |         |       |       |                   |         |  |  |
| Model 1                  | 1.00 | 1.32              | (0.34 | –                    | 5.16)  | 1.56  | (0.41 | –                    | 5.92)   | 3.70  | (1.00 | –                 | 13.64)  |  |  |
| Model 2                  | 1.00 | 1.28              | (0.32 | –                    | 5.15)  | 1.56  | (0.41 | –                    | 5.97)   | 3.85  | (1.03 | –                 | 14.40)  |  |  |
| High waist circumference |      |                   |       |                      |        |       |       |                      |         |       |       |                   |         |  |  |
| Model 1                  | 1.00 | 1.04              | (0.30 | –                    | 3.65)  | 2.45  | (0.74 | –                    | 8.13)   | 2.34  | (0.69 | –                 | 7.93)   |  |  |
| Model 2                  | 1.00 | 0.95              | (0.26 | –                    | 3.53)  | 3.05  | (0.86 | –                    | 10.82)  | 2.37  | (0.67 | –                 | 8.45)   |  |  |
| Low HDL cholesterol      |      |                   |       |                      |        |       |       |                      |         |       |       |                   |         |  |  |
| Model 1                  | 1.00 | 7.55              | (0.83 | –                    | 68.55) | 9.56  | (1.07 | –                    | 85.28)  | 18.42 | (2.12 | –                 | 160.20) |  |  |
| Model 2                  | 1.00 | 5.10              | (0.52 | –                    | 50.46) | 15.82 | (1.62 | –                    | 154.99) | 25.17 | (2.63 | –                 | 240.60) |  |  |
| High TG                  |      |                   |       |                      |        |       |       |                      |         |       |       |                   |         |  |  |
| Model 1                  | 1.00 | 1.95              | (0.60 | –                    | 6.33)  | 1.45  | (0.44 | –                    | 4.75)   | 2.13  | (0.65 | –                 | 6.99)   |  |  |
| Model 2                  | 1.00 | 2.15              | (0.63 | –                    | 7.34)  | 1.45  | (0.43 | –                    | 4.89)   | 2.42  | (0.70 | –                 | 8.34)   |  |  |
| High BP                  |      |                   |       |                      |        |       |       |                      |         |       |       |                   |         |  |  |
| Model 1                  | 1.00 | 1.56              | (0.48 | –                    | 5.09)  | 0.67  | (0.20 | –                    | 2.27)   | 4.07  | (1.12 | –                 | 14.76)  |  |  |
| Model 2                  | 1.00 | 2.10              | (0.57 | –                    | 7.70)  | 0.52  | (0.14 | –                    | 1.93)   | 5.86  | (1.41 | –                 | 24.38)  |  |  |
| High blood glucose       |      |                   |       |                      |        |       |       |                      |         |       |       |                   |         |  |  |
| Model 1                  | 1.00 | 3.09              | (0.61 | –                    | 15.72) | 4.13  | (0.85 | –                    | 20.13)  | 2.53  | (0.47 | –                 | 13.56)  |  |  |
| Model 2                  | 1.00 | 3.35              | (0.62 | –                    | 17.99) | 3.16  | (0.64 | –                    | 15.61)  | 2.41  | (0.43 | –                 | 13.47)  |  |  |

Model 1: adjusted for age; Model 2: Model 1 plus additional adjustments for smoking, alcohol consumption, and physical exercise.

**Table S2.** Odds ratios (OR) and 95% confidence intervals (CI) for metabolic syndrome and associated risk factors according to the LPS/HDL ratio in women.

|                          |      | LPS/HDL quartiles |       |                      |        |      |                      |   |        |                   |       |   |        |
|--------------------------|------|-------------------|-------|----------------------|--------|------|----------------------|---|--------|-------------------|-------|---|--------|
|                          |      | Quartile 1 (<0.7) |       | Quartile 2 (0.7–1.2) |        |      | Quartile 3 (1.2–2.1) |   |        | Quartile 4 (≥2.1) |       |   |        |
|                          |      | OR                | OR    | (95% CI)             |        | OR   | (95% CI)             |   | OR     | (95% CI)          |       |   |        |
| Metabolic syndrome       |      |                   |       |                      |        |      |                      |   |        |                   |       |   |        |
| Model 1                  | 1.00 | 1.32              | (0.30 | –                    | 5.81)  | 1.04 | (0.22                | – | 4.88)  | 0.80              | (0.17 | – | 3.76)  |
| Model 2                  | 1.00 | 1.28              | (0.28 | –                    | 5.81)  | 1.07 | (0.22                | – | 5.06)  | 0.86              | (0.18 | – | 4.13)  |
| High waist circumference |      |                   |       |                      |        |      |                      |   |        |                   |       |   |        |
| Model 1                  | 1.00 | 1.31              | (0.31 | –                    | 5.58)  | 1.01 | (0.22                | – | 4.59)  | 0.68              | (0.13 | – | 3.44)  |
| Model 2                  | 1.00 | 1.28              | (0.29 | –                    | 5.56)  | 1.03 | (0.23                | – | 4.65)  | 0.69              | (0.13 | – | 3.56)  |
| Low HDL cholesterol      |      |                   |       |                      |        |      |                      |   |        |                   |       |   |        |
| Model 1                  | 1.00 | 1.00              | (0.29 | –                    | 3.46)  | 2.10 | (0.64                | – | 6.86)  | 4.60              | (1.38 | – | 15.26) |
| Model 2                  | 1.00 | 0.93              | (0.26 | –                    | 3.30)  | 2.07 | (0.63                | – | 6.78)  | 4.33              | (1.29 | – | 14.56) |
| High TG                  |      |                   |       |                      |        |      |                      |   |        |                   |       |   |        |
| Model 1                  | 1.00 | 1.32              | (0.30 | –                    | 5.85)  | 1.39 | (0.31                | – | 6.18)  | 2.01              | (0.50 | – | 8.09)  |
| Model 2                  | 1.00 | 1.27              | (0.28 | –                    | 5.73)  | 1.36 | (0.31                | – | 6.09)  | 1.86              | (0.45 | – | 7.64)  |
| High BP                  |      |                   |       |                      |        |      |                      |   |        |                   |       |   |        |
| Model 1                  | 1.00 | 2.12              | (0.51 | –                    | 8.80)  | 1.39 | (0.31                | – | 6.20)  | 3.41              | (0.87 | – | 13.32) |
| Model 2                  | 1.00 | 1.90              | (0.43 | –                    | 8.36)  | 1.34 | (0.29                | – | 6.12)  | 2.88              | (0.71 | – | 11.70) |
| High blood glucose       |      |                   |       |                      |        |      |                      |   |        |                   |       |   |        |
| Model 1                  | 1.00 | 4.66              | (0.48 | –                    | 45.62) | 2.18 | (0.18                | – | 25.97) | 2.79              | (0.27 | – | 29.25) |
| Model 2                  | 1.00 | 4.55              | (0.44 | –                    | 47.26) | 2.36 | (0.19                | – | 29.13) | 3.48              | (0.31 | – | 38.58) |

Model 1: adjusted for age; Model 2: Model 1 plus additional adjustments for alcohol consumption and physical exercise; BP, blood pressure; TG, triglyceride.

**Table S3.** The association between the LPS/HDL ratio and metabolic syndrome based on blood Cd concentrations.

|                          | Men  |               | Women |               |
|--------------------------|------|---------------|-------|---------------|
|                          | OR   | (95% CI)      | OR    | (95% CI)      |
| Metabolic syndrome       |      |               |       |               |
| Cd < 50th percentile     | 1.29 | (0.58 – 2.86) | 1.51  | (0.61 – 3.73) |
| Cd ≥ 50th percentile     | 3.07 | (1.41 – 6.68) | 0.73  | (0.35 – 1.51) |
| High waist circumference |      |               |       |               |
| Cd < 50th percentile     | 1.67 | (0.76 – 3.64) | 1.81  | (0.76 – 4.27) |
| Cd ≥ 50th percentile     | 1.56 | (0.86 – 2.83) | 0.53  | (0.22 – 1.30) |
| Low HDL cholesterol      |      |               |       |               |
| Cd < 50th percentile     | 1.38 | (0.57 – 3.29) | 2.21  | (1.12 – 4.39) |
| Cd ≥ 50th percentile     | 3.50 | (1.33 – 9.22) | 1.57  | (0.84 – 2.91) |
| High TG                  |      |               |       |               |
| Cd < 50th percentile     | 1.15 | (0.58 – 2.25) | 1.33  | (0.59 – 3.00) |
| Cd ≥ 50th percentile     | 1.60 | (0.89 – 2.89) | 1.30  | (0.69 – 2.45) |
| High BP                  |      |               |       |               |
| Cd < 50th percentile     | 1.90 | (0.88 – 4.08) | 1.79  | (0.84 – 3.80) |
| Cd ≥ 50th percentile     | 1.41 | (0.74 – 2.70) | 1.17  | (0.62 – 2.19) |
| High blood glucose       |      |               |       |               |
| Cd < 50th percentile     | 1.14 | (0.47 – 2.74) | 1.99  | (0.59 – 6.67) |
| Cd ≥ 50th percentile     | 1.52 | (0.74 – 3.14) | 1.16  | (0.46 – 2.93) |

Model adjusted for age, smoking, alcohol consumption and physical exercise in men, age, alcohol consumption and physical exercise in women. Cd, Cadmium; BP, blood pressure; TG, triglyceride. The cutoff values for 50th percentile of Cd are 0.96 µg/L for men, 1.28 µg/L for women.
